# Supplementary material
Source: PubMed Central journal article supplement (PMC2396701)
Supplement: 0801105105_Supplemental_PDF.pdf [file 0801105105_Supplemental_PDF.pdf]

# Supporting Information

Guo *et al.* 10.1073/pnas.0801105105

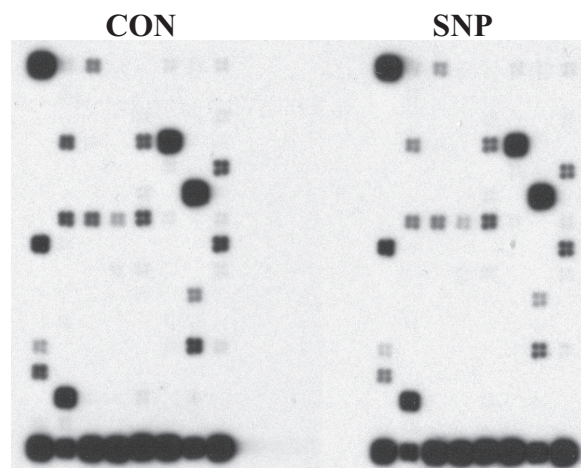

**Fig. S1.** Representative image of microarray OHS-031. (*Left*) Cerebral endothelial cells under normal conditions demonstrate baseline expression of many growth factors and receptors. (*Right*) Exposure to nonlethal levels of SNP broadly reduces expression levels of many growth factors and receptors systems.

**Table S1. Nonlethal levels of SNP in cerebral endothelial cells reduces gene expression of many neurotrophins and neurotrophin receptors**

| Symbol      | Ratio (SNP/CON) | Gene name                                              |
|-------------|-----------------|--------------------------------------------------------|
| ARTN        | 0.48            | Artemin                                                |
| BDNF        | 0.62            | Brain-derived neurotrophic factor                      |
| CNTF        | N/A*            | Ciliary neurotrophic factor                            |
| FGF2        | 0.36            | Fibroblast growth factor 2 (basic)                     |
| FGF9        | N/A             | Fibroblast growth factor 9 (glia-activating factor)    |
| FUS         | 0.93            | Fusion (involved in t(12;16) in malignant liposarcoma) |
| GDNF        | N/A             | Glia cell derived neurotrophic factor                  |
| GMF $\beta$ | 0.63            | Glia maturation factor, beta                           |
| NF1         | N/A             | Neurofibromin 1                                        |
| NRG1        | 0.60            | Neuregulin 1                                           |
| NGF $\beta$ | 0.52            | Nerve growth factor, beta polypeptide                  |
| NTF3        | N/A             | Neurotrophin 3                                         |
| NTF5        | 0.46            | Neurotrophin 5                                         |
| CNTFR       | N/A             | Ciliary neurotrophic factor receptor                   |
| FGFR1       | 0.41            | Fibroblast growth factor receptor 1                    |
| NGFR        | 0.62            | Nerve growth factor receptor                           |
| TrkA        | N/A             | Neurotrophic tyrosine kinase receptor, type 1          |
| TrkB        | N/A             | Neurotrophic tyrosine kinase receptor, type 2          |
| TrkC        | N/A             | Neurotrophic tyrosine kinase receptor, type 3          |

\*N/A, nonavailable for the genes with undetectable signal(s) in our system.
